# Supplementary material for: Anti-Inflammatory, Anti-Arthritic and Anti-Nociceptive Activities of Nigella sativa Oil in a Rat Model of Arthritis
Source: PubMed Central journal article supplement (PMC6769720; doi:10.3390/antiox8090342), 2019-08-25
Supplement: antioxidants-08-00342-s001.pdf [file antioxidants-08-00342-s001.pdf]

**Supplementary Table S1.** Effect of *Nigella sativa* oil on anxiety-like behavior of open field test in CFA-induced arthritic rats.

|              | <b>CFA</b><br><br><b>n= 12 rats</b> | <b>CFA+Indo-<br/>methacin</b><br><b>(3 mg/kg)</b><br><b>n= 12 rats</b> | <b>CFA+<i>Nigella</i><br/><i>sativa</i></b><br><b>(1.82 mL/kg)</b><br><b>n= 11 rats</b> | <b>CFA+<i>Nigella</i><br/><i>sativa</i></b><br><b>(0.91 mL/kg)</b><br><b>n= 12 rats</b> | <b>Control</b><br><br><b>n= 12 rats</b> |
|--------------|-------------------------------------|------------------------------------------------------------------------|-----------------------------------------------------------------------------------------|-----------------------------------------------------------------------------------------|-----------------------------------------|
| % Amb. Cnts  | 3.97±2.01                           | 3.67±1.80                                                              | 4.46±2.10                                                                               | 4.70±2.01                                                                               | 4.73±1.67                               |
| % Vert. Cnts | 1.65±2.23                           | 1.28±1.87                                                              | 1.76±2.32                                                                               | 1.98±1.43                                                                               | 1.63±1.32                               |

% Amb. Cnts= percentage ambulatory counts; % Vert. Cnts = percentage vertical counts. Data expressed as mean ± standard deviation were analysed using one-way ANOVA. P>0.05.
